# Supplementary material
Source: PubMed Central journal article supplement (PMC3324009)
Supplement: 1120215109_pnas.1120215109_SI.pdf [file 1120215109_pnas.1120215109_SI.pdf]

# Supporting Information

Lerner et al. 10.1073/pnas.1120215109

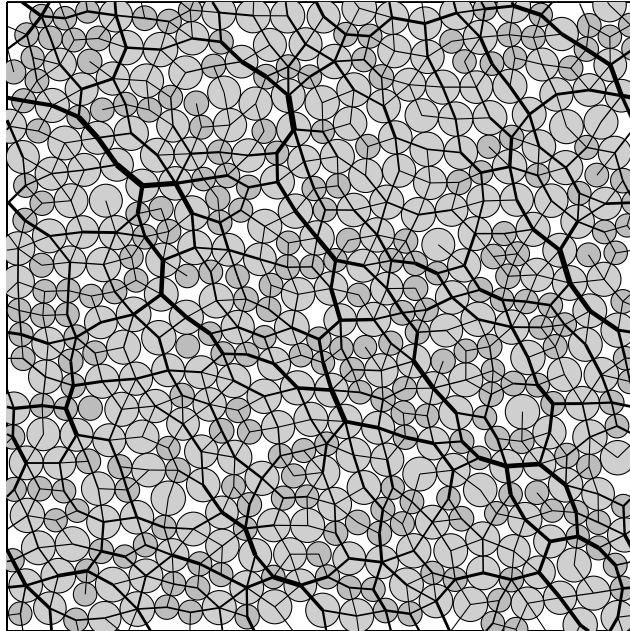

**Movie S1.** A movie from our simulations of suspension flows at packing fraction of  $\Phi = 0.830$ , with  $N = 484$  particles. The widths of the black lines connecting centers of particles in contact are proportional to the forces exerted between the particles. Small particles are in blue, large particles are in yellow.

[Movie S1 \(AVI\)](#)
